# Supplementary material for: A genetically encoded tool for reconstituting synthetic modulatory neurotransmission and reconnect neural circuits in vivo
Source: Nat Commun. 2021 Aug 9;12:4795. doi: 10.1038/s41467-021-24690-9 (PMC8352926; doi:10.1038/s41467-021-24690-9)
Supplement: Supplementary file 4 — Supplementary Data 1 [file 41467_2021_24690_MOESM4_ESM.xlsx]

## Sheet: Sheet1
Plasmid ID	#	Addgene #	Desc name	Sequence	Alt names	Ref	Resistance	Backbone	Promoter	CDS	Fluorophore	UTR
pJH1	1		pIRES2-GFP	LOCUS pJH01_p731_PT326 5308 bp ds-DNA circular 14-SEP-2020 DEFINITION . ACCESSION VERSION SOURCE . ORGANISM . COMMENT Created: ÐÇÆÚÒ», ÁùÔÂ 02, 2008 2:56 PM COMMENT COMMENT ApEinfo:methylated:1 FEATURES Location/Qualifiers misc_feature 591..666 /locus_tag="MCS" /label="MCS" /ApEinfo_label="MCS" /ApEinfo_fwdcolor="#7eff74" /ApEinfo_revcolor="#7eff74" /ApEinfo_graphicformat="arrow_data {{0 1 2 0 0 …	DACR3296, ClonTech 6029-1		Kan, Neo		CMV		GFP
pJH2	2		pIRES2-dsRed	LOCUS pJH02_p732_PT366 5265 bp ds-DNA circular 14-SEP-2020 DEFINITION . ACCESSION VERSION SOURCE . ORGANISM . COMMENT Created: ÐÇÆÚÒ», ÁùÔÂ 02, 2008 2:56 PM COMMENT COMMENT ApEinfo:methylated:1 FEATURES Location/Qualifiers misc_feature 591..666 /locus_tag="MCS" /label="MCS" /ApEinfo_label="MCS" /ApEinfo_fwdcolor="#7eff74" /ApEinfo_revcolor="#7eff74" /ApEinfo_graphicformat="arrow_data {{0 1 2 0 0 …	DACR3297, ClonTech 632463		Kan, Neo		CMV		dsRed
pJH38	38	105447	pCAGGS-ChrimsonR-mRuby2-ST	LOCUS pJH38_pCAGGS_ChR 6799 bp ds-DNA circular 16-SEP-2020 DEFINITION Cation channelrhodopsin ChrimsonR fused to mRuby2 fluorophore and targeted to the neuronal soma and proximal dendrites. ACCESSION . VERSION . KEYWORDS pCAGGS-ChrimsonR-mRuby2-ST SOURCE synthetic DNA construct ORGANISM synthetic DNA construct REFERENCE 1 (bases 1 to 6799) AUTHORS Pegard NC, Mardinly AR, Oldenburg IA, Sridharan S…		Pegard et al Nat Commun. 2017 Oct 31;8(1):1228. doi:	Amp		CMV	Chrimson	mRuby
pJH39	39	108902	pCAG-ChroME-mRuby2-ST	LOCUS pJH39_pCAG_ChRoM 7794 bp ds-DNA circular 16-SEP-2020 DEFINITION Cation channelrhodopsin ChroME fused to mRuby2 fluorophore and targeted to the neuronal soma and proximal dendrites. ACCESSION . VERSION . KEYWORDS pCAG-ChroME-mRuby2-ST SOURCE synthetic DNA construct ORGANISM synthetic DNA construct REFERENCE 1 (bases 1 to 7794) AUTHORS Mardinly AR, Oldenburg IA, Pegard NC, Sridharan S, Lyall …		Mardinly et al Nat Neurosci. 2018 Apr 30. pii: 10.1038/	Amp		CMV	ChRoME	mRuby
pJH40	40	40755	pGP-CMV-GCaMP6f	LOCUS pJH40_pGP_CMV_GC 5308 bp ds-DNA circular 16-SEP-2020 DEFINITION Mammalian expression of ultrasensitive protein calcium sensor. ACCESSION . VERSION . KEYWORDS pGP-CMV-GCaMP6f SOURCE synthetic DNA construct ORGANISM synthetic DNA construct REFERENCE 1 (bases 1 to 5308) AUTHORS Chen TW, Wardill TJ, Sun Y, Pulver SR, Renninger SL, Baohan A, Schreiter ER, Kerr RA, Orger MB, Jayaraman V, Looger L…		Chen et al Nature. 2013 Jul 18;499(7458):295-300. d	Amp		CMV		GCaMP6f
pJH53	53	160408	pE12_HyCal2	LOCUS pJH53_pE12_HyCal 3974 bp ds-DNA circular 10-SEP-2020 DEFINITION . ACCESSION VERSION SOURCE . ORGANISM . COMMENT Insert from 710520-3 15 to 1471 COMMENT Backbone from pJH19_pDONR221 2897 to 651 COMMENT ApEinfo:methylated:1 FEATURES Location/Qualifiers primer_bind complement(2235..2255) /locus_tag="M13-rev" /label="M13-rev" /ApEinfo_label="M13-rev" /ApEinfo_fwdcolor="forestgreen" /ApEinfo_rev…		this pub	Kan	pENTR1-2	n/a	HyCal2 (pJH53)	n/a	n/a
pJH54	54	160409	pE12_HyCal7	LOCUS pJH54_pE12_HyCal 4079 bp ds-DNA circular 10-SEP-2020 DEFINITION . ACCESSION VERSION SOURCE . ORGANISM . COMMENT Insert from 710520-4 15 to 1576 COMMENT Backbone from pJH19_pDONR221 2897 to 651 COMMENT ApEinfo:methylated:1 FEATURES Location/Qualifiers primer_bind complement(2340..2360) /locus_tag="M13-rev" /label="M13-rev" /ApEinfo_label="M13-rev" /ApEinfo_fwdcolor="forestgreen" /ApEinfo_rev…		this pub	Kan	pENTR1-2	n/a	HyCal7 (pJH54)	n/a	n/a
pJH55	55	160410	pE12_HyCal9	LOCUS pJH55_pE12_HyCal 3926 bp ds-DNA circular 10-SEP-2020 DEFINITION . ACCESSION VERSION SOURCE . ORGANISM . COMMENT Insert from 710520-5 15 to 1423 COMMENT Backbone from pJH19_pDONR221 2897 to 651 COMMENT ApEinfo:methylated:1 FEATURES Location/Qualifiers primer_bind complement(2187..2207) /locus_tag="M13-rev" /label="M13-rev" /ApEinfo_label="M13-rev" /ApEinfo_fwdcolor="forestgreen" /ApEinfo_rev…		this pub	Kan	pENTR1-2	n/a	HyCal9 (pJH55)	n/a	n/a
pJH66	66	18672	pEZY3	LOCUS pJH66_pEZY3_CMV_ 7694 bp ds-DNA circular 13-SEP-2020 DEFINITION pcDNA3 converted Gateway Destination vector for mammalian expression. ACCESSION . VERSION . KEYWORDS pEZY3 SOURCE synthetic DNA construct ORGANISM synthetic DNA construct REFERENCE 1 (bases 1 to 7694) AUTHORS Guo F, Chiang MY, Wang Y, Zhang YZ TITLE An in vitro recombination method to convert restriction- and ligation-independe…	pEZY3	Guo et al Biotechnol J. 2008 Mar . 3(3):370-7.	Amp	pEZY3 (pJH66)	CMV	n/a	n/a	bGH poly(A)
pJH73	73	160418	pCMV_HyCal2	LOCUS pJH73_pCMV_hyNaC 6906 bp ds-DNA circular 10-SEP-2020 DEFINITION . ACCESSION VERSION SOURCE . ORGANISM . COMMENT Insert from pJH53_pE12_hyNaCh2 652 to 2108 COMMENT Backbone from pJH66_pEZY3_CMV-GW 3203 to 957 COMMENT ApEinfo:methylated:1 FEATURES Location/Qualifiers CDS 989..2398 /locus_tag="hyNaC2" /label="hyNaC2" /ApEinfo_label="hyNaC2" /ApEinfo_fwdcolor="#e9d024" /ApEinfo_revcolor="#e9d02…		this pub	Amp	pEZY3 (pJH66)	CMV	HyCal2 (pJH53)	n/a	n/a
pJH74	74	160419	pCMV_HyCal7	LOCUS pJH74_pCMV_HyCal 7011 bp ds-DNA circular 10-SEP-2020 DEFINITION . ACCESSION VERSION SOURCE . ORGANISM . COMMENT Insert from pJH54_pE12_hyNaCh7 652 to 2213 COMMENT Backbone from pJH66_pEZY3_CMV-GW 3203 to 957 COMMENT ApEinfo:methylated:1 FEATURES Location/Qualifiers CDS 989..2503 /locus_tag="hyNaC7" /label="hyNaC7" /ApEinfo_label="hyNaC7" /ApEinfo_fwdcolor="#e9d024" /ApEinfo_revcolor="#e9d02…		this pub	Amp	pEZY3 (pJH66)	CMV	HyCal7 (pJH54)	n/a	n/a
pJH75	75	160420	pCMV_HyCal9	LOCUS pJH75_pCMV_HyCal 6858 bp ds-DNA circular 10-SEP-2020 DEFINITION . ACCESSION VERSION SOURCE . ORGANISM . COMMENT Insert from pJH55_pE12_hyNaCh9 652 to 2060 COMMENT Backbone from pJH66_pEZY3_CMV-GW 3203 to 957 COMMENT ApEinfo:methylated:1 FEATURES Location/Qualifiers CDS 989..2350 /locus_tag="hyNaC9" /label="hyNaC9" /ApEinfo_label="hyNaC9" /ApEinfo_fwdcolor="#e9d024" /ApEinfo_revcolor="#e9d02…		this pub	Amp	pEZY3 (pJH66)	CMV	HyCal9 (pJH55)	n/a	n/a
pJH111	111		myo-3p::HyCal2	LOCUS pJH111_myo3p_HyN 6774 bp ds-DNA circular 13-SEP-2020 DEFINITION . ACCESSION VERSION SOURCE . ORGANISM . COMMENT Promoter from DACR2997_pENT249[L4-myo-3p-L1R] 675 to 3113 COMMENT Gene from pJH53_pE12_hyNaCh2 652 to 2108 COMMENT UTR from DACR1670_pENTR[2-3]let858UTR.ape 199 to 652 COMMENT Backbone from DACR688_pDEST-R4-R3 1727 to 43 COMMENT ApEinfo:methylated:1 FEATURES Location/Qualifiers pr…		this pub	Amp	pDESTR4-R3	myo-3p (pJH137)	HyCal2 (pJH53)	n/a	let-858 (pJH136)
pJH112	112		myo-3p::HyCal7	LOCUS pJH112_myo3p_HyN 6879 bp ds-DNA circular 13-SEP-2020 DEFINITION . ACCESSION VERSION SOURCE . ORGANISM . COMMENT Promoter from DACR2997_pENT249[L4-myo-3p-L1R] 675 to 3113 COMMENT Gene from pJH54_pE12_hyNaCh7 652 to 2213 COMMENT UTR from DACR1670_pENTR[2-3]let858UTR.ape 199 to 652 COMMENT Backbone from DACR688_pDEST-R4-R3 1727 to 43 COMMENT ApEinfo:methylated:1 FEATURES Location/Qualifiers pr…		this pub	Amp	pDESTR4-R3	myo-3p (pJH137)	HyCal7 (pJH54)	n/a	let-858 (pJH136)
pJH113	113		myo-3p::HyCal9	LOCUS pJH113_myo3p_HyN 6726 bp ds-DNA circular 13-SEP-2020 DEFINITION . ACCESSION VERSION SOURCE . ORGANISM . COMMENT Promoter from DACR2997_pENT249[L4-myo-3p-L1R] 675 to 3113 COMMENT Gene from pJH55_pE12_hyNaCh9 652 to 2060 COMMENT UTR from DACR1670_pENTR[2-3]let858UTR.ape 199 to 652 COMMENT Backbone from DACR688_pDEST-R4-R3 1727 to 43 COMMENT ApEinfo:methylated:1 FEATURES Location/Qualifiers pr…		this pub	Amp	pDESTR4-R3	myo-3p (pJH137)	HyCal9 (pJH55)	n/a	let-858 (pJH136)
pJH119	119	160417	pCMV_HyPep-emGFP	LOCUS pJH103_pCMV_HyPe 6702 bp ds-DNA circular 10-SEP-2020 DEFINITION . COMMENT COMMENT COMMENT ApEinfo:methylated:1 FEATURES Location/Qualifiers promoter 3010..3340 /locus_tag="SV40 promoter" /label="SV40 promoter" /ApEinfo_label="SV40 promoter" /ApEinfo_fwdcolor="#346ee0" /ApEinfo_revcolor="#346ee0" /ApEinfo_graphicformat="arrow_data {{0 1 2 0 0 -1} {} 0} width 5 offset 0" primer_bind 863..882 …		this pub	Amp	pEZY3 (pJH66)	CMV	HyPep-emGFP (pJH120)	emGFP	n/a
pJH120	120	160406	pE12_HyPep_emGFP	LOCUS pJH120_pE12_preP 3770 bp ds-DNA circular 10-SEP-2020 DEFINITION . ACCESSION VERSION SOURCE . ORGANISM . COMMENT Insert from pJH103_pCMV_synthNP-emGFP.gb 958 to 2210 COMMENT Backbone from DACR692_pDONR221 2897 to 651 COMMENT ApEinfo:methylated:1 FEATURES Location/Qualifiers misc_feature 1008..1030 /locus_tag="hyRFaII" /label="hyRFaII" /ApEinfo_label="hyRFaII" /ApEinfo_fwdcolor="#9eafd2" /ApE…		this pub	Kan	pENTR1-2	n/a	HyPep-emGFP (pJH120)	emGFP	n/a
pJH122	122	8937	unc-122p::GFP	LOCUS pJH122_unc122p_G 8474 bp ds-DNA circular 29-SEP-2020 DEFINITION synthetic circular DNA ACCESSION . VERSION . KEYWORDS coel::GFP SOURCE synthetic DNA construct ORGANISM synthetic DNA construct REFERENCE 1 (bases 1 to 8474) AUTHORS Miyabayashi T, Palfreyman MT, Sluder AE, Slack F, Sengupta P TITLE Expression and function of members of a divergent nuclear receptor family in Caenorhabditis eleg…	DACR20	Miyabayashi et al Dev Biol. 1999 Nov 15. 215(2):314-31.	Amp	n/a	unc-122p		GFP
pJH123	123	8938	unc-122p::dsRed	LOCUS pJH123_unc122p_d 8284 bp ds-DNA circular 29-SEP-2020 DEFINITION synthetic circular DNA ACCESSION . VERSION . KEYWORDS coel::RFP SOURCE synthetic DNA construct ORGANISM synthetic DNA construct REFERENCE 1 (bases 1 to 8284) AUTHORS Miyabayashi T, Palfreyman MT, Sluder AE, Slack F, Sengupta P TITLE Expression and function of members of a divergent nuclear receptor family in Caenorhabditis eleg…	DACR218	Miyabayashi et al Dev Biol. 1999 Nov 15. 215(2):314-31.	Amp	n/a	unc-122p		dsRed
pJH129	129		pE41 rab-3p	LOCUS 3854 bp ds-DNA circular 30-MAY-2006 DEFINITION ACCESSION VERSION SOURCE ORGANISM COMMENT COMMENT ApEinfo:methylated:1 FEATURES Location/Qualifiers misc_recomb join(3848..3854,1..14) /ApEinfo_label=attB4 /ApEinfo_fwdcolor=#dda0dd /ApEinfo_revcolor=#dda0dd misc_feature 1226..1246 /ApEinfo_label=AttB1 /ApEinfo_fwdcolor=#dda0dd /ApEinfo_revcolor=#dda0dd misc_recomb join(3773..3854,1..14) /ApEin…	DACR837		Kan	pDONRP4-P1R	rab-3p (pJH129)	n/a	n/a	n/a
pJH136	136		pE23 let-858	LOCUS pJH136_pE23let858utr 3072 bp ds-DNA circular 13-SEP-2020 DEFINITION ACCESSION VERSION SOURCE ORGANISM COMMENT Insert from /Users/audesylvannaada-nguema/Desktop/let-858-pcr-entry.str 13 to 472 Backbone from /Users/audesylvannaada-nguema/Documents/vectors/gateway/pDONR-P2R-P 3 vector.str 2889 to 733 COMMENT ApEinfo:methylated:1 FEATURES Location/Qualifiers primer_bind complement(213..227) /lo…	DACR1670		Kan	pDONRP2R-P3	n/a	n/a	n/a	let-858 (pJH136)
pJH137	137		pDEST 43	LOCUS 4107 bp ds-DNA circular 23-JAN-2007 ACCESSION VERSION SOURCE ORGANISM COMMENT COMMENT ApEinfo:methylated:1 FEATURES Location/Qualifiers primer_bind complement(1748..1765) /label=M13-fwd /ApEinfo_fwdcolor=forestgreen /ApEinfo_revcolor=dodgerblue primer_bind 1..21 /label=M13-rev /ApEinfo_fwdcolor=forestgreen /ApEinfo_revcolor=dodgerblue rep_origin 3298..3980 /label=ColE1 origin /ApEinfo_fwdco…	DACR688		Amp	pDESTR4-R3	n/a	n/a	n/a	n/a
pJH138	138		pE41 myo-3p	LOCUS pJH138_myo_3p 5061 bp ds-DNA circular 13-SEP-2020 DEFINITION . ACCESSION VERSION SOURCE . ORGANISM . COMMENT Insert from B4-myo-3p-B1R 13 to 2451 COMMENT Backbone from pDONRP4-P1R 2830 to 674 COMMENT ApEinfo:methylated:1 FEATURES Location/Qualifiers primer_bind 695..712 /locus_tag="M13-fwd" /label="M13-fwd" /ApEinfo_label="M13-fwd" /ApEinfo_fwdcolor="cyan" /ApEinfo_revcolor="green" /ApEinfo…	pENT249, DACR2997		Kan	pDONRP4-P1R	myo-3p (pJH138)	n/a	n/a	n/a
pJH139	139		pE41 elt-7p	LOCUS pJH139_pE41_elt_ 5081 bp ds-DNA circular 13-SEP-2020 DEFINITION . ACCESSION VERSION SOURCE . ORGANISM . COMMENT DACR3182 [4-1] che-2p in pENT175 hypo from 1 to 3318 COMMENT DACR2946 (pENT175[L4-MCS_Fire Vector-L1R]) from 1 to 2699 COMMENT Backbone from pDONRP4-P1R 2830 to 674 COMMENT COMMENT ApEinfo:methylated:1 FEATURES Location/Qualifiers primer_bind 536..553 /locus_tag="M13-fwd" /label="…	DACR3183		Kan	pDONRP4-P1R	elt-7p (pJH139)	n/a	n/a	n/a
pJH141	141		rab-3p::synthNP-emGFP	LOCUS pJH141_rab3p_pre 5363 bp ds-DNA circular 13-SEP-2020 DEFINITION . ACCESSION VERSION SOURCE . ORGANISM . COMMENT Promoter from DACR837 P_rab-3 [4-1] 1 to 1232 COMMENT Gene from pJH120_pE12_preProSynth_emGFP 652 to 1904 COMMENT UTR from DACR1670_pENTR[2-3]let858UTR.ape 199 to 652 COMMENT Backbone from DACR688_pDEST-R4-R3 1727 to 43 COMMENT ApEinfo:methylated:1 FEATURES Location/Qualifiers mis…		this pub	Amp	pDESTR4-R3	rab-3p (pJH129)	HyPep-emGFP (pJH120)	emGFP	let-858 (pJH136)
pJH142	142		elt-7p::synthNP-emGFP	LOCUS pJH142_elt7p_syn 6590 bp ds-DNA circular 13-SEP-2020 DEFINITION . ACCESSION VERSION SOURCE . ORGANISM . COMMENT Promoter from pJH139_DACR3183 pJHL59 [4-1] elt-7p 675 to 3133 COMMENT Gene from pJH120_pE12_preProSynth_emGFP 652 to 1904 COMMENT UTR from pJH136_DACR1670_pENTR[2-3]let858UTR.ape 199 to 652 COMMENT Backbone from pJH137_DACR688_pDEST-R4-R3 1727 to 43 COMMENT ApEinfo:methylated:1 FE…		this pub	Amp	pDESTR4-R3	elt-7p (pJH139)	HyPep-emGFP (pJH120)	emGFP	let-858 (pJH136)
pJh145	145		pE41 tph-1(2.6kb)p-sl2	LOCUS DACR3760_pJH145_ 6031 bp DNA circular 25-JAN-2021 DEFINITION . ACCESSION VERSION SOURCE . ORGANISM . COMMENT Insert from attB4_pttx3_SL2_attB1 13 to 1128 COMMENT Backbone from pDONR-P4-P1R (for promoters) 2830 to 674 COMMENT ApEinfo:methylated:1 FEATURES Location/Qualifiers misc_feature 3828..4063 /locus_tag="SL2" /label="SL2" /ApEinfo_label="SL2" /ApEinfo_fwdcolor="cyan" /ApEinfo_revcolor=…	DACR3760		Kan	pDONRP4-P1R	tph-1p (pJH145)	n/a	n/a	n/a
pJH161	161	160407	pE12_HyPep_mRuby	LOCUS pJH161_pE12_HyPe 3767 bp ds-DNA circular 10-SEP-2020 DEFINITION . ACCESSION VERSION SOURCE . ORGANISM . COMMENT Insert from pJH103_pCMV_synthNP-emGFP.gb 958 to 2210 COMMENT Backbone from DACR692_pDONR221 2897 to 651 COMMENT COMMENT ApEinfo:methylated:1 FEATURES Location/Qualifiers misc_feature 1008..1030 /locus_tag="hyRFaII" /label="hyRFaII" /ApEinfo_label="hyRFaII" /ApEinfo_fwdcolor="#9eaf…		this pub	Kan	pENTR1-2	n/a	HyPep-mRuby (pJH161)	mRuby	n/a
pJH198	198	160411	pE12_HyCal2-eGFP	LOCUS New_DNA 4702 bp DNA linear 25-JAN-2021 DEFINITION . ACCESSION VERSION SOURCE . ORGANISM . COMMENT COMMENT ApEinfo:methylated:1 FEATURES Location/Qualifiers primer_bind complement(2963..2983) /locus_tag="M13-rev" /label="M13-rev" /ApEinfo_label="M13-rev" /ApEinfo_fwdcolor="forestgreen" /ApEinfo_revcolor="dodgerblue" /ApEinfo_graphicformat="arrow_data {{0 1 2 0 0 -1} {} 0} width 5 offset 0" p…		this pub	Kan	pENTR1-2	n/a	HyCal2-eGFP (pJH198)	eGFP	n/a
pJH199	199	160412	pE12_HyCal2-mCherry	LOCUS pJH199_pENTR221_ 4869 bp DNA linear 25-JAN-2021 DEFINITION . ACCESSION VERSION SOURCE . ORGANISM . COMMENT COMMENT COMMENT ApEinfo:methylated:1 FEATURES Location/Qualifiers CDS 3263..4072 /locus_tag="KanR" /label="KanR" /ApEinfo_label="KanR" /ApEinfo_fwdcolor="yellow" /ApEinfo_revcolor="yellow" /ApEinfo_graphicformat="arrow_data {{0 1 2 0 0 -1} {} 0} width 5 offset 0" primer_bind 537..552 /…		this pub	Kan	pENTR1-2	n/a	HyCal2-mCh (pJH199)	mCherry	n/a
pJH200	200	160413	pE12_HyCal7-eGFP	LOCUS pJH200_pE12_hyCa 4807 bp ds-DNA circular 10-SEP-2020 DEFINITION . ACCESSION VERSION SOURCE . ORGANISM . COMMENT Insert from 710520-4 15 to 1576 COMMENT Backbone from pJH19_pDONR221 2897 to 651 COMMENT COMMENT ApEinfo:methylated:1 FEATURES Location/Qualifiers primer_bind complement(3068..3088) /locus_tag="M13-rev" /label="M13-rev" /ApEinfo_label="M13-rev" /ApEinfo_fwdcolor="forestgreen" /ApE…		this pub	Kan	pENTR1-2	n/a	HyCal7-eGFP (pJH200)	eGFP	n/a
pJH201	201	160414	pE12_HyCal7-mCherry	LOCUS pJH201_pE12_hyCa 4963 bp ds-DNA circular 10-SEP-2020 DEFINITION . ACCESSION VERSION SOURCE . ORGANISM . COMMENT Insert from 710520-4 15 to 1576 COMMENT Backbone from pJH19_pDONR221 2897 to 651 COMMENT ApEinfo:methylated:1 FEATURES Location/Qualifiers primer_bind complement(3224..3244) /locus_tag="M13-rev" /label="M13-rev" /ApEinfo_label="M13-rev" /ApEinfo_fwdcolor="forestgreen" /ApEinfo_rev…		this pub	Kan	pENTR1-2	n/a	HyCal7-mCh (pJH201)	mCherry	n/a
pJH202	202	160415	pE12_HyCal9-eGFP	LOCUS pJH202_pE12_hyCa 4654 bp ds-DNA circular 10-SEP-2020 DEFINITION . ACCESSION VERSION SOURCE . ORGANISM . COMMENT Insert from 710520-5 15 to 1423 COMMENT Backbone from pJH19_pDONR221 2897 to 651 COMMENT COMMENT ApEinfo:methylated:1 FEATURES Location/Qualifiers primer_bind complement(2915..2935) /locus_tag="M13-rev" /label="M13-rev" /ApEinfo_label="M13-rev" /ApEinfo_fwdcolor="forestgreen" /ApE…		this pub	Kan	pENTR1-2	n/a	HyCal9-eGFP (pJH202)	eGFP	n/a
pJH203	203	160416	pE12_HyCal9-mCherry	LOCUS pJH203_pE12_hyCa 4810 bp ds-DNA circular 10-SEP-2020 DEFINITION . ACCESSION VERSION SOURCE . ORGANISM . COMMENT Insert from 710520-5 15 to 1423 COMMENT Backbone from pJH19_pDONR221 2897 to 651 COMMENT COMMENT ApEinfo:methylated:1 FEATURES Location/Qualifiers primer_bind complement(3071..3091) /locus_tag="M13-rev" /label="M13-rev" /ApEinfo_label="M13-rev" /ApEinfo_fwdcolor="forestgreen" /ApE…		this pub	Kan	pENTR1-2	n/a	HyCal9-mCh (pJH203)	mCherry	n/a
pJH208	208		inx-1p (1kb)	LOCUS pJH208_DACR990_p 3595 bp DNA circular 25-JAN-2021 DEFINITION . ACCESSION VERSION SOURCE . ORGANISM . COMMENT Insert from U:/Plasmids/[4-1]promoters/attB4_pinx1_attB1b.gb 13 to 985 Backbone from U:/Plasmids/pDONRs/pDONR-P4-P1R (for promoters).gb 2830 to 674 COMMENT ApEinfo:methylated:1 FEATURES Location/Qualifiers primer_bind complement(1182..1202) /locus_tag="M13-rev" /label="M13-rev" /ApEi…	DACR990		Kan	pDONRP4-P1R	inx-1p (pJH208)	n/a	n/a	n/a
pJH237	237		rab-3p::HyCal2:mCherry		DACR3654		Amp	pDESTR4-R3	rab-3p (pJH129)	HyCal2-mCh (pJH199)	mCherry	let-858 (pJH136)
pJH238	238		rab-3p::HyCal7:mCherry		DACR3653		Amp	pDESTR4-R3	rab-3p (pJH129)	HyCal7-mCh (pJH201)	mCherry	let-858 (pJH136)
pJH239	239		rab-3p::HyCal9:mCherry		DACR3655		Amp	pDESTR4-R3	rab-3p (pJH129)	HyCal9-mCh (pJH203)	mCherry	let-858 (pJH136)
pJH240	240		myo3-p::HyCal2:mCherry		DACR3657		Amp	pDESTR4-R3	myo-3p (pJH138)	HyCal2-mCh (pJH199)	mCherry	let-858 (pJH136)
pJH241	241		myo3-p::HyCal7:mCherry		DACR3658		Amp	pDESTR4-R3	myo-3p (pJH138)	HyCal7-mCh (pJH201)	mCherry	let-858 (pJH136)
pJH242	242		myo3-p::HyCal9:mCherry		DACR3659		Amp	pDESTR4-R3	myo-3p (pJH138)	HyCal9-mCh (pJH203)	mCherry	let-858 (pJH136)
pJH265	265		unc-47::HyCal2::mCherry::let-858		DACR3676		Amp	pDESTR4-R3	unc-47p (pJH268)	HyCal2-mCh (pJH199)	mCherry	let-858 (pJH136)
pJH266	266		unc-47::HyCal7::mCherry::let-858		DACR3677		Amp	pDESTR4-R3	unc-47p (pJH268)	HyCal7-mCh (pJH201)	mCherry	let-858 (pJH136)
pJH267	267		unc-47::HyCal9::mCherry::let-858		DACR3678		Amp	pDESTR4-R3	unc-47p (pJH268)	HyCal9-mCh (pJH203)	mCherry	let-858 (pJH136)
pJH268	268		unc-47 promoter		DACR1092		Kan	pDONRP4-P1R	unc-47p (pJH268)	n/a	n/a	n/a
pJH276	276		tph-1p::HyPep::GFP		DACR3736		Amp	pDESTR4-R3	tph-1p (pJH145)	HyPep-emGFP (pJH120)	GFP	let-858 (pJH136)
				al
